# Supplementary material for: Synthesis of a SiO2 nanofibre confined Ni catalyst by electrospinning for the CO2 reforming of methane
Source: Royal Society of Chemistry journal article supplement (doi:10.1039/c5ta01699a), 2015-01-01
Supplement: c5ta01699a1.pdf [file c5ta01699a1.pdf]

## Supporting Information

# Synthesis of SiO<sub>2</sub> nanofibre confined Ni catalyst by electrospinning for CO<sub>2</sub> reforming of methane

*Shipeng Wen,<sup>ab</sup> Meili Liang,<sup>ab</sup> Junma Zou,<sup>ab</sup> Sun Wang,<sup>ab</sup> Xiandong Zhu,<sup>ab</sup> Li Liu<sup>ab</sup> and Zhou-jun*

*Wang<sup>\*ab</sup>*

<sup>a</sup> State Key Laboratory of Chemical Resource Engineering, Beijing University of Chemical Technology, 15 Beisanhuan East Road, P.O. Box 266, Chaoyang District, Beijing 100029, P.R. China.

<sup>b</sup> State Key Laboratory of Organic-Inorganic Composites. Beijing University of Chemical Technology, 15 Beisanhuan East Road, P.O. Box 266, Chaoyang District, Beijing 100029, P.R. China.

---

\* Correspondence author. Tel./Fax: +86 10 64437983. E-mail: wangzj@mail.buct.edu.cn

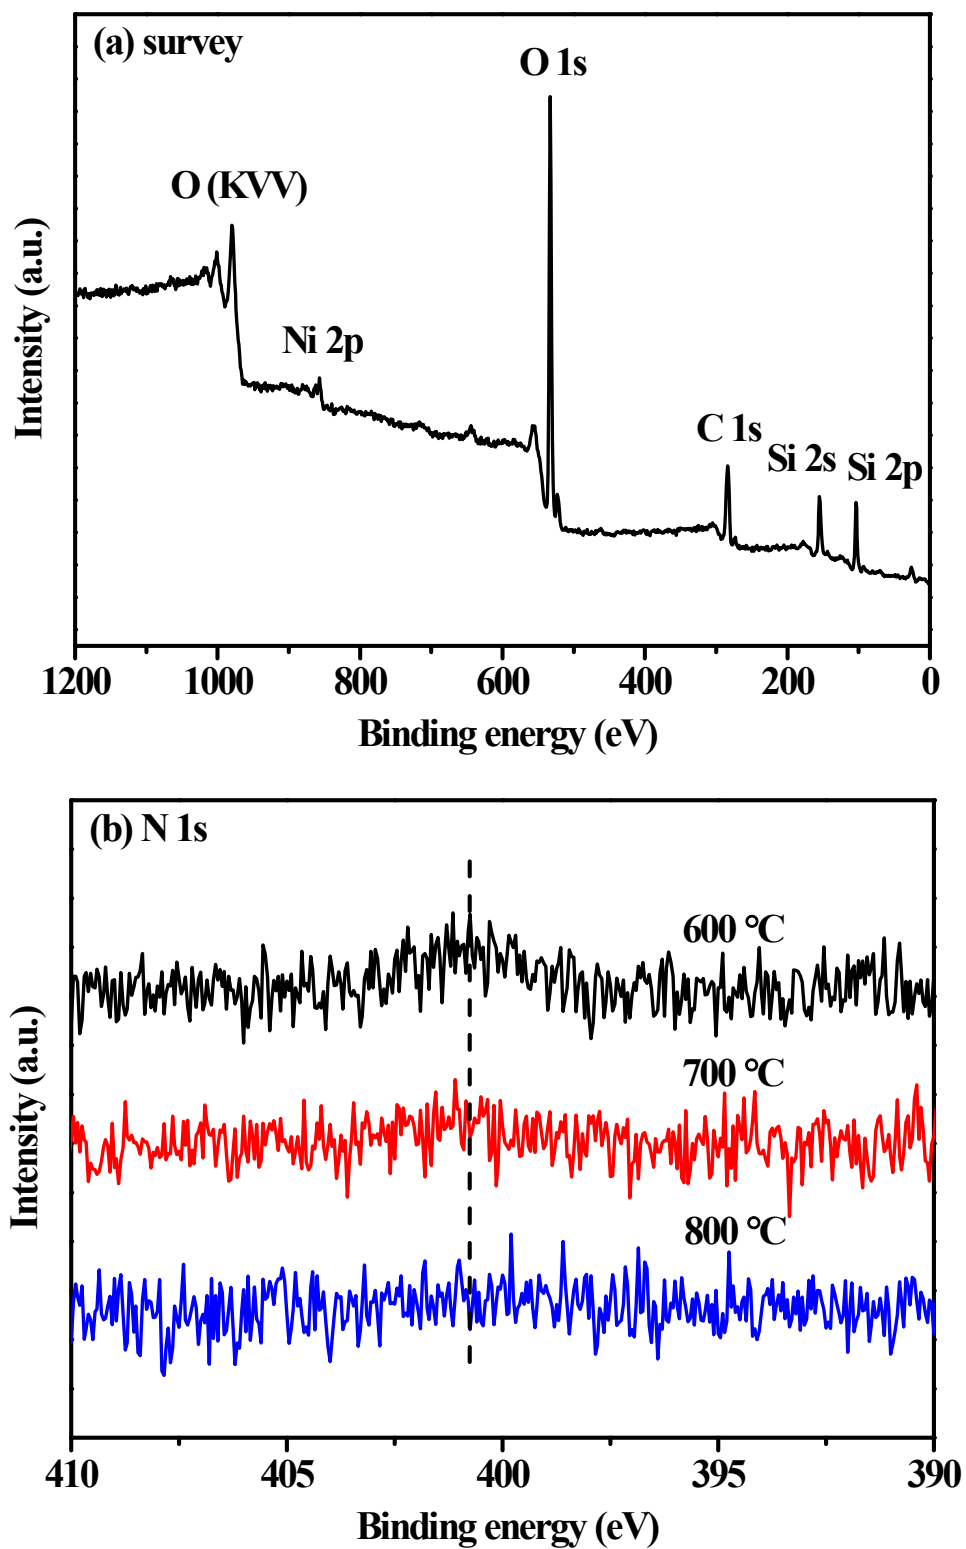

Fig. S1 XPS spectra of the calcined Ni/SiO<sub>2</sub>-F catalysts: (a) survey scan for catalyst calcined at 600 °C; (b) high resolution scan of N 1s for catalyst calcined at indicated temperatures.

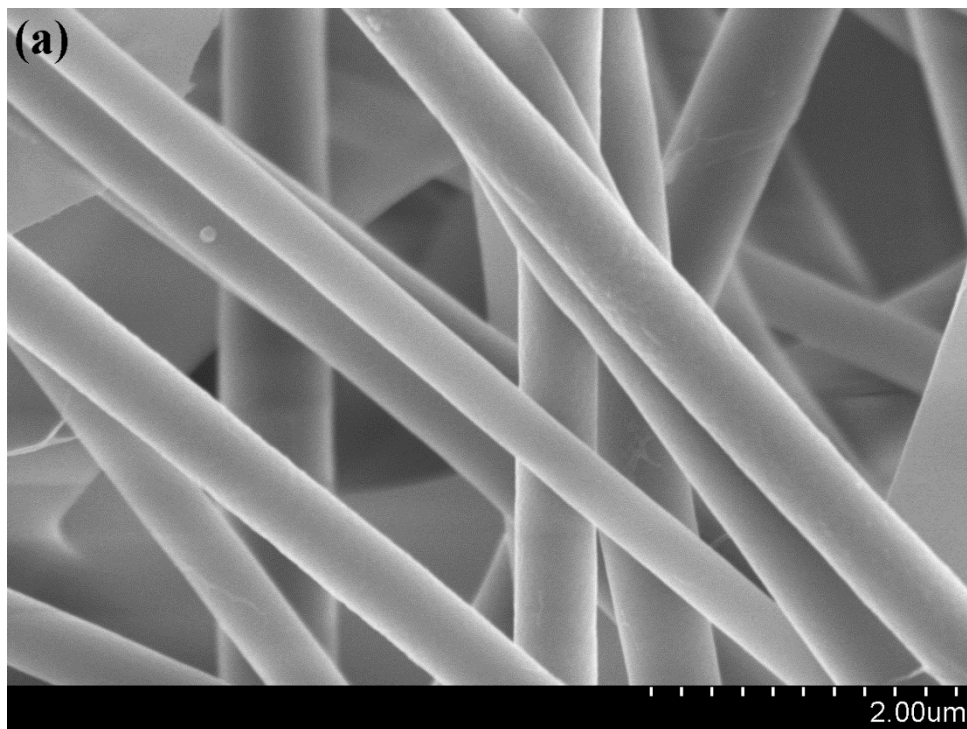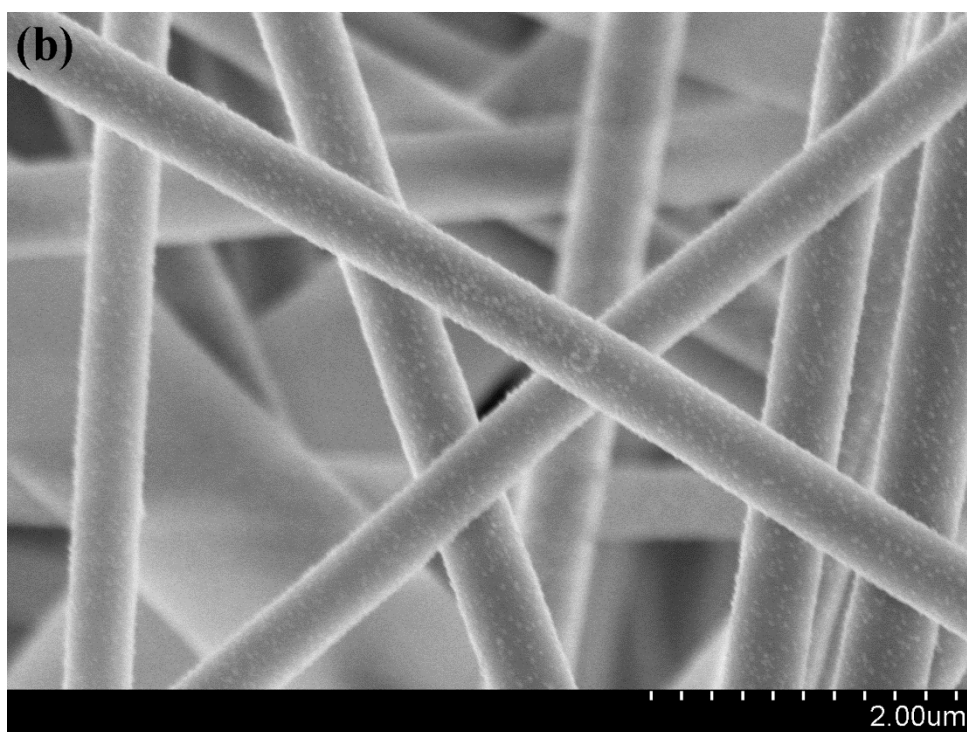

Fig. S2 SEM images of the Ni/SiO<sub>2</sub>-F catalyst before (a) and after (b) calcination at 800 °C.

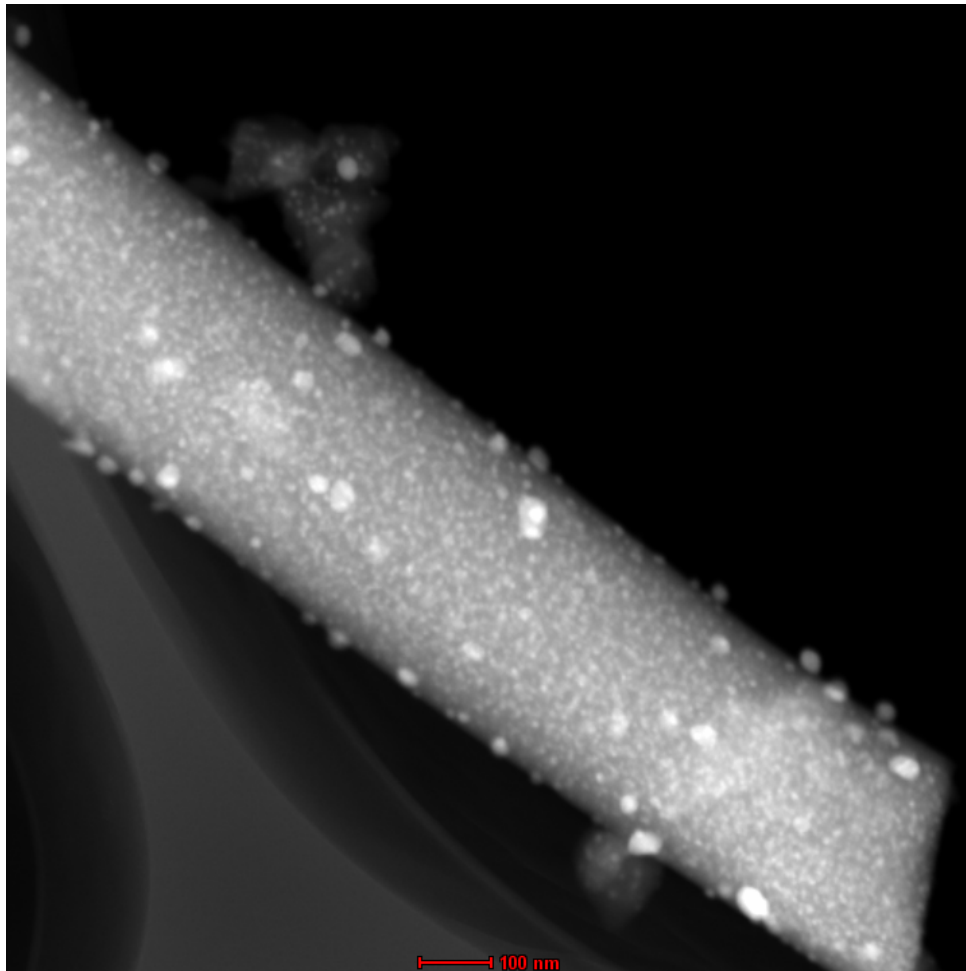

Fig. S3 STEM image of the fresh Ni/SiO<sub>2</sub>-F catalyst. The white dots corresponded to Ni nanoparticles.

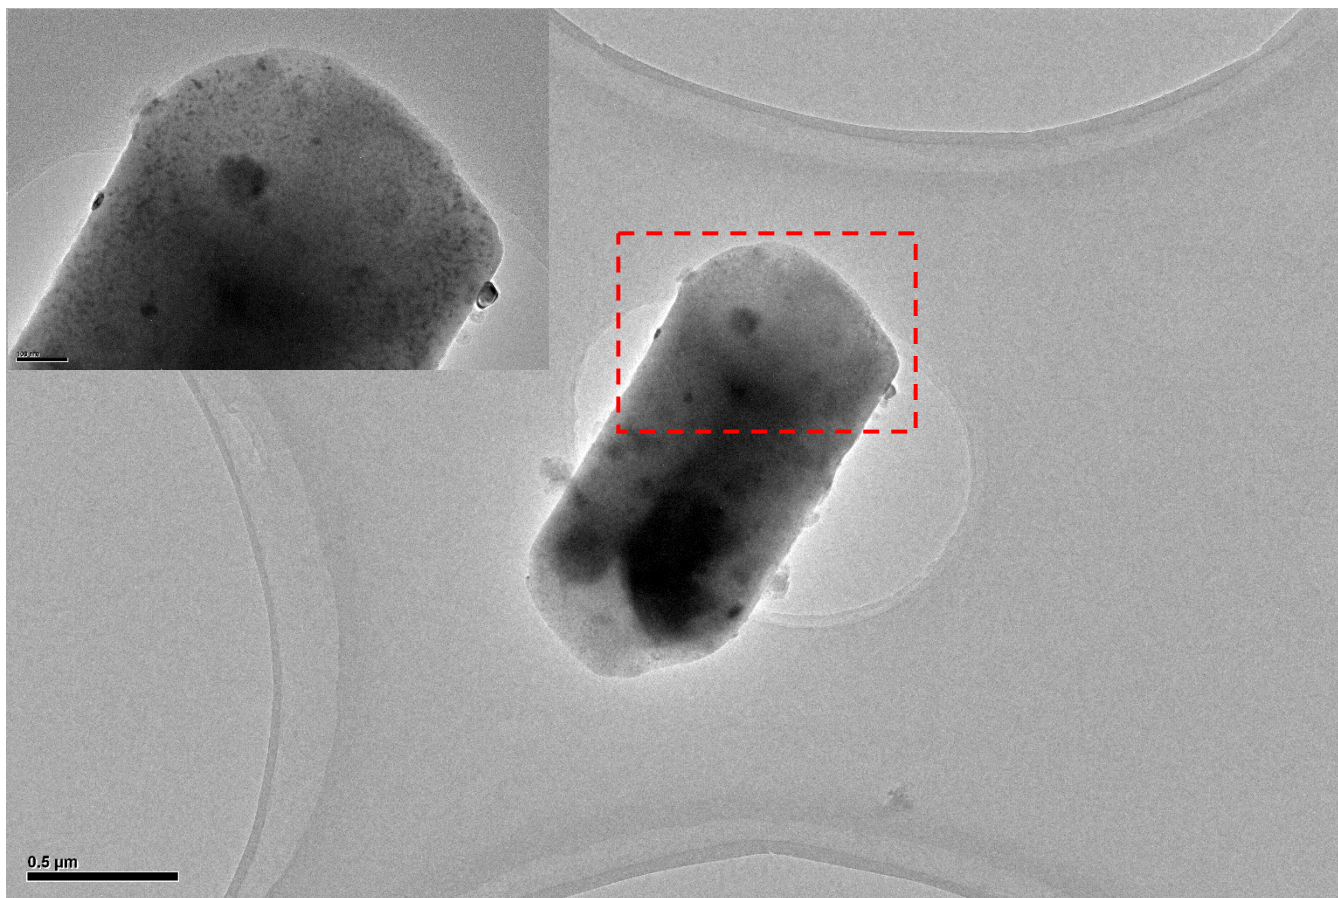

Fig. S4 HR-TEM image of the cross-section of the fresh Ni/SiO<sub>2</sub>-F catalyst. Scale bar of the inset HR-TEM image is 100 nm.

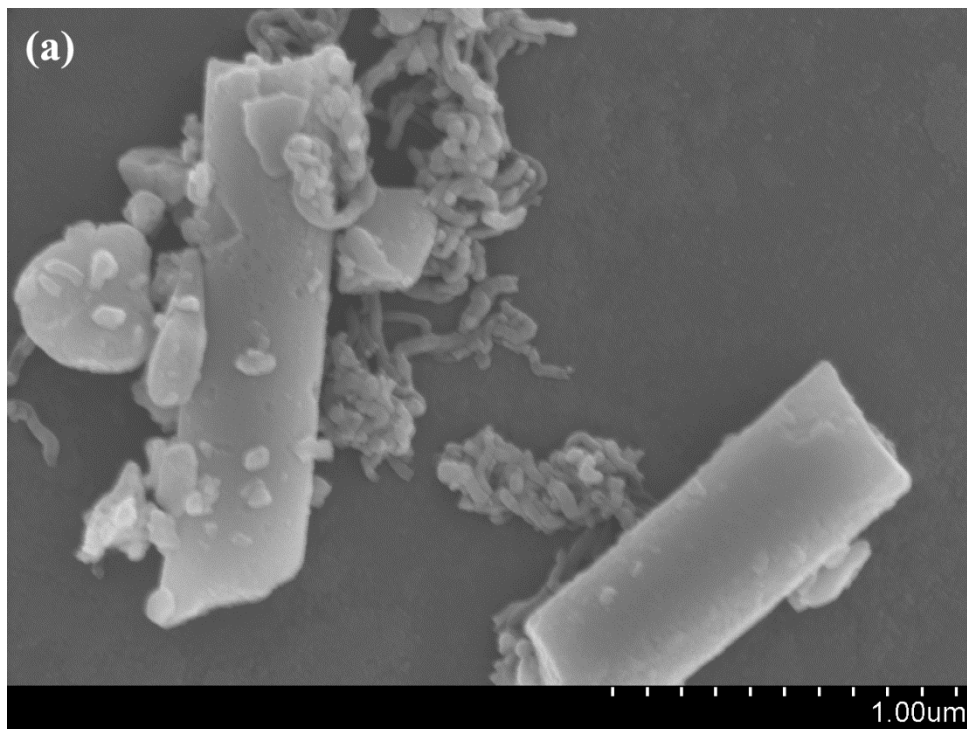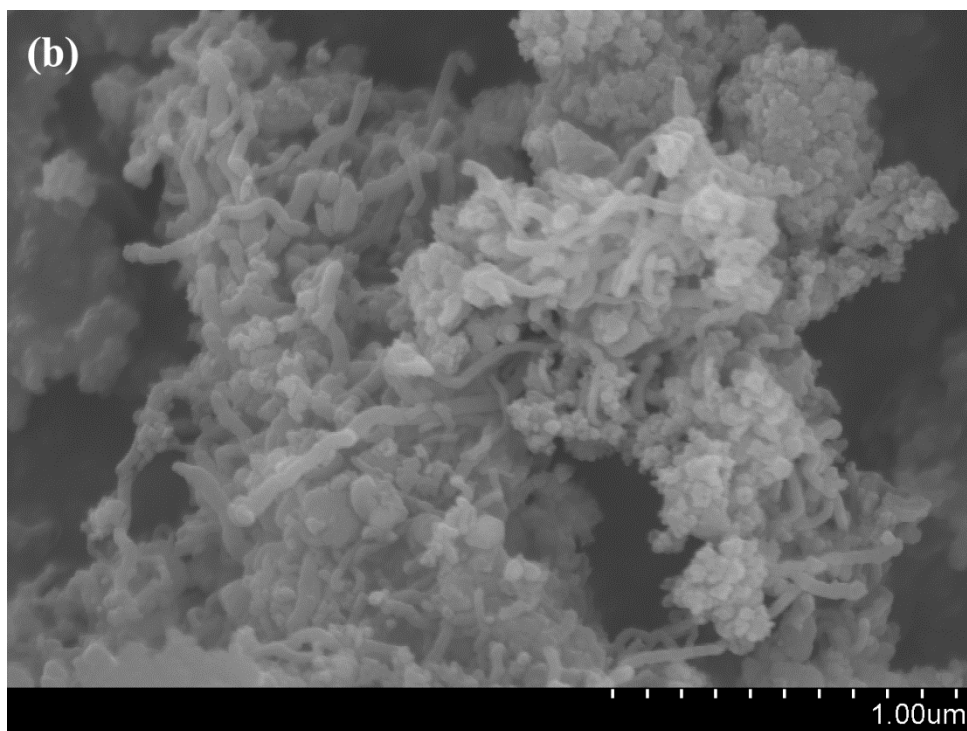

Fig. S5 SEM images of the spent Ni/SiO<sub>2</sub>-F (a) and Ni/SiO<sub>2</sub>-C (b) catalysts after reaction of 360 min.

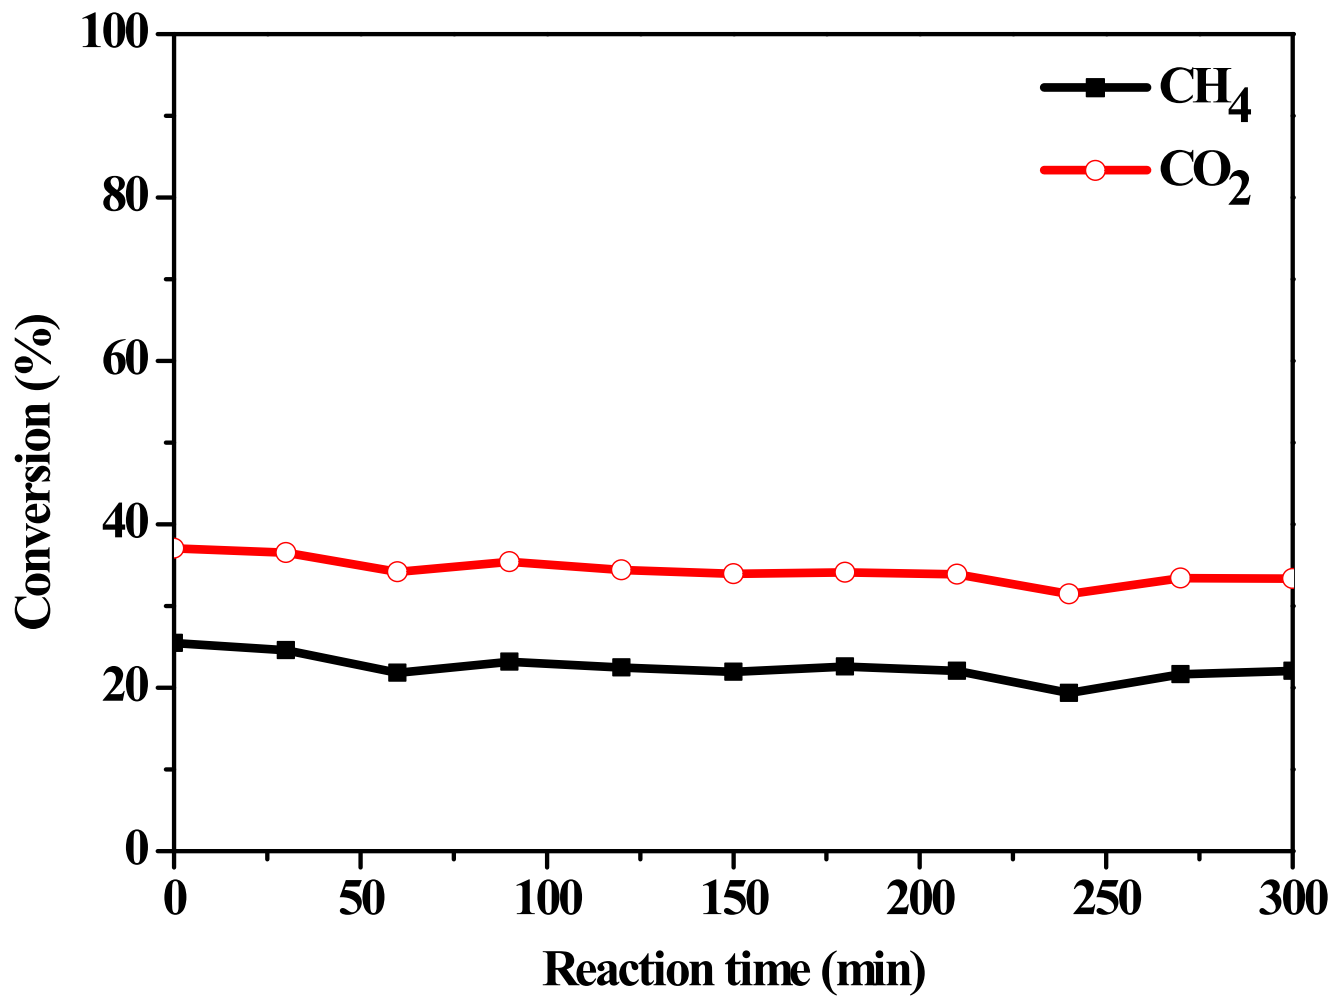

Fig. S6 Catalytic performances of the Ni/SiO<sub>2</sub>-FI catalyst. Reaction conditions: P= 1 atm; T=700 °C; the nickel amount=10 wt%; CH<sub>4</sub>:CO<sub>2</sub>:Ar=1:1:2; GHSV=48 000 ml (h gcat)<sup>-1</sup>.

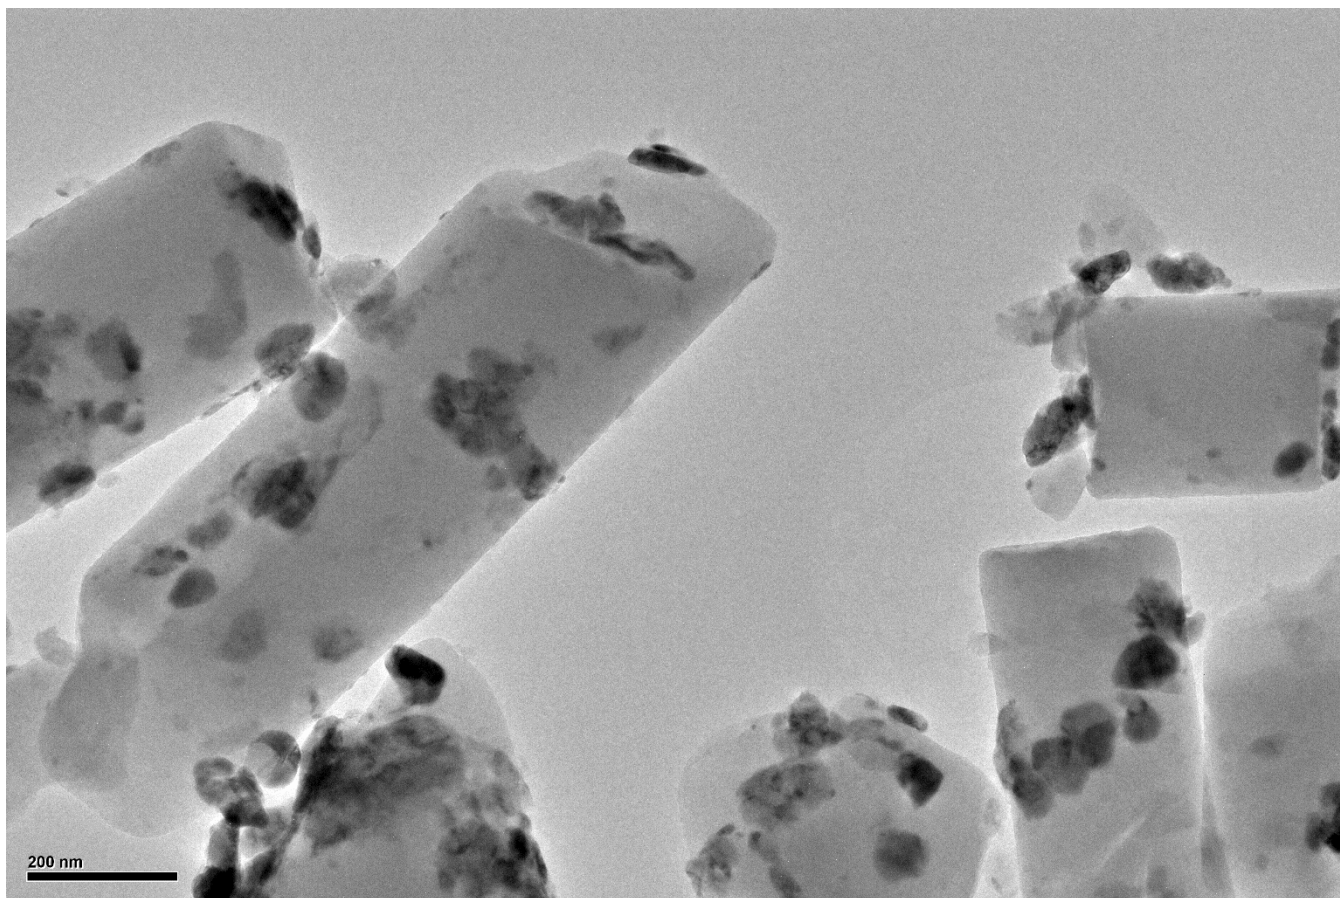

Fig. S7 HR-TEM image of the fresh Ni/SiO<sub>2</sub>-FI catalyst.



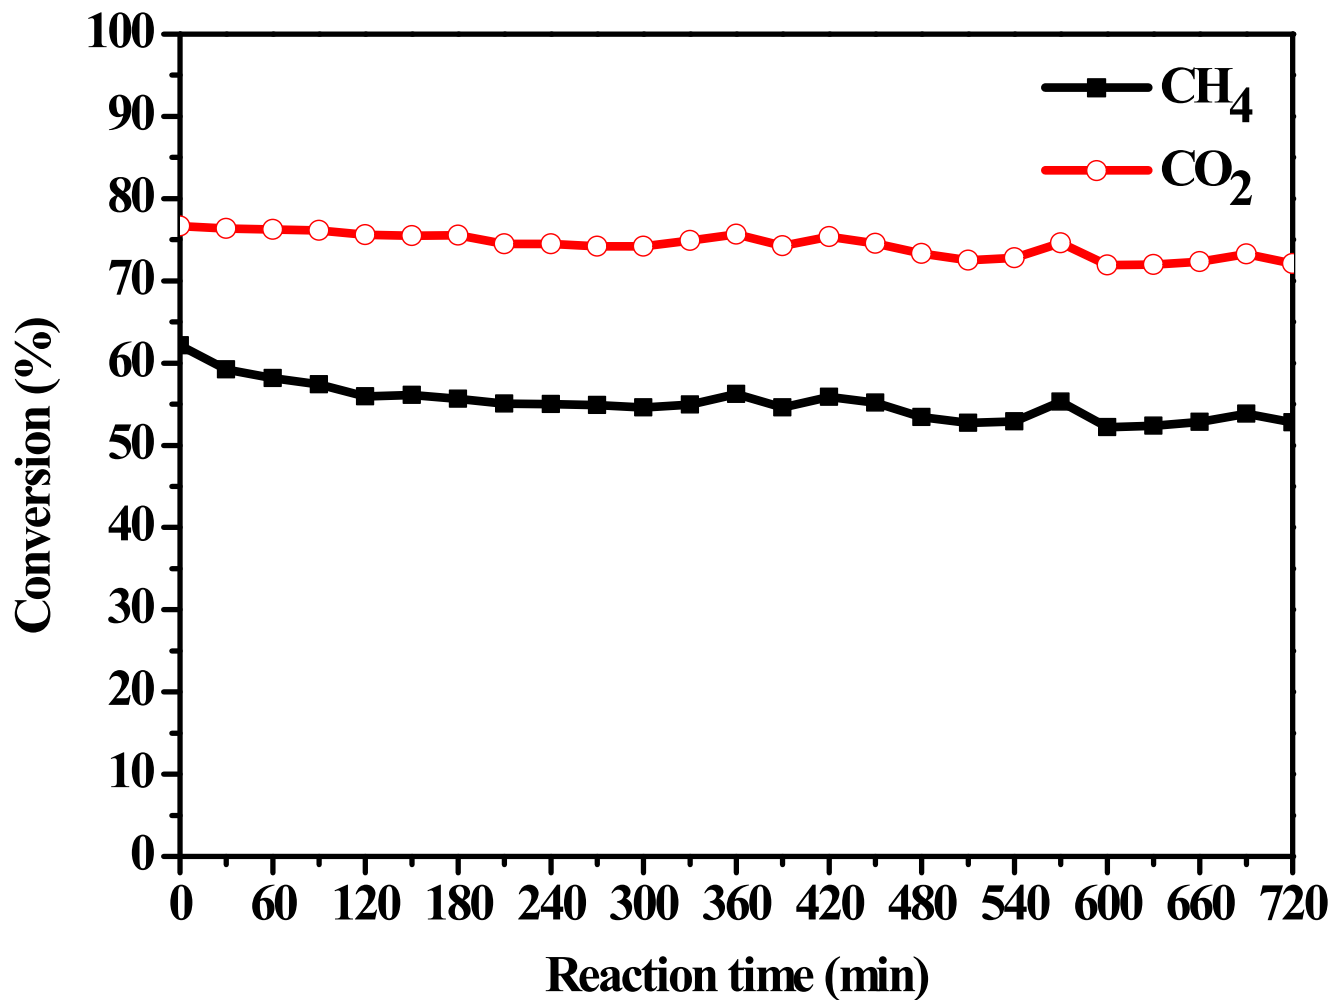

Fig. S8 Catalytic performances of the Ni/SiO<sub>2</sub>-F catalyst with a prolonged reaction time. Reaction conditions: P= 1 atm; T=700 °C; the nickel amount=10 wt%; CH<sub>4</sub>:CO<sub>2</sub>:Ar=1:1:2; GHSV=48 000 ml (h gcat)<sup>-1</sup>.
